# Supplementary material for: Linker Length Drives Heterogeneity of Multivalent Complexes of Hub Protein LC8 and Transcription Factor ASCIZ
Source: MDPI journal article supplement (doi:10.3390/biom13030404), 2023-02-21
Supplement: s1 [file s1]

**Table S1. Thermodynamic parameter fits of the QT-LC8 interactions.**

| Construct                   | N              |               | Overall $K_d$<br>( $\mu$ M) | Overall $\Delta H$<br>(kcal/mol) | Overall $\Delta S$<br>(kcal/mol) | Overall $\Delta G$<br>(kcal/mol) |
|-----------------------------|----------------|---------------|-----------------------------|----------------------------------|----------------------------------|----------------------------------|
| QT 2-4                      | $2.7 \pm 0.02$ |               | $4.8 \pm 0.2$               | $-13.9 \pm 0.2$                  | $-6.6 \pm 0.2$                   | $-7.3 \pm 0.03$                  |
| QT 2                        | $1.0 \pm 0.01$ |               | $9.3 \pm 0.3$               | $-10.7 \pm 0.1$                  | $-3.9 \pm 0.1$                   | $-6.9 \pm 0.02$                  |
| QT 3                        | $1.2 \pm 0.02$ |               | $36 \pm 2$                  | $-8.4 \pm 0.3$                   | $-2.3 \pm 0.3$                   | $-6.1 \pm 0.03$                  |
| QT 4                        | $1.0 \pm 0.01$ |               | $15 \pm 1$                  | $-16.1 \pm 0.3$                  | $-9.5 \pm 0.3$                   | $-6.6 \pm 0.03$                  |
| QT 2,3                      | $1.9 \pm 0.02$ |               | $6.3 \pm 0.3$               | $-9.2 \pm 0.1$                   | $-2.1 \pm 0.1$                   | $-7.1 \pm 0.03$                  |
| QT 3,4                      | $1.1 \pm 0.02$ |               | $4.4 \pm 0.4$               | $-12.3 \pm 0.4$                  | $-5.0 \pm 0.4$                   | $-7.3 \pm 0.06$                  |
| QT 2,4                      | $1.4 \pm 0.01$ |               | $1.8 \pm 0.1$               | $-13.2 \pm 0.2$                  | $-5.4 \pm 0.$                    | $-7.8 \pm 0.04$                  |
| QT2-4<br>sequential sites   | QT2            |               | $6.2 \pm 1.1$               | $-15.9 \pm 0.9$                  | $-8.9 \pm 0.9$                   | $-7.1 \pm 0.1$                   |
|                             | QT4            |               | $7.6 \pm 1.2$               | $-18.2 \pm 2.0$                  | $-11.2 \pm 2.0$                  | $-7.0 \pm 0.1$                   |
|                             | QT3            |               | $27 \pm 4$                  | $-1.4 \pm 2.2$                   | $4.9 \pm 2.2$                    | $-6.2 \pm 0.1$                   |
| QT2,3<br>sequential sites   | QT2            |               | $0.9 \pm 0.1$               | $-7.9 \pm 0.1$                   | $0.4 \pm 0.1$                    | $-8.3 \pm 0.07$                  |
|                             | QT3            |               | $15 \pm 1$                  | $-10.1 \pm 0.1$                  | $-3.5 \pm 0.2$                   | $-6.6 \pm 0.02$                  |
| QT3,4<br>sequential sites   | QT4            |               | $2.2 \pm 0.2$               | $-11.5 \pm 0.3$                  | $-3.8 \pm 0.3$                   | $-7.7 \pm 0.1$                   |
|                             | QT3            |               | $40 \pm 9$                  | $-2.4 \pm 0.6$                   | $3.6 \pm 0.7$                    | $-6.0 \pm 0.2$                   |
| QT2,4<br>sequential sites   | QT2            |               | $0.11 \pm 0.04$             | $-12.4 \pm 0.3$                  | $-2.9 \pm 0.5$                   | $-9.5 \pm 0.3$                   |
|                             | QT4            |               | $3.2 \pm 0.8$               | $-5.6 \pm 0.4$                   | $1.9 \pm 0.4$                    | $-7.5 \pm 0.2$                   |
| QT2,3 two-<br>sets of sites | QT2            | $1.4 \pm 0.2$ | $1.3 \pm 0.5$               | $-8.0 \pm 0.2$                   | $0.02 \pm 0.4$                   | $-8.0 \pm 0.3$                   |
|                             | QT3            | $1.1 \pm 0.8$ | $18.9 \pm 4.1$              | $-6.7 \pm 7.3$                   | $-0.2 \pm 7.3$                   | $-6.4 \pm 0.2$                   |
| QT3,4 two-<br>sets of sites | QT4            | $0.8 \pm 0.2$ | $1.9 \pm 1.4$               | $-10.9 \pm 1.3$                  | $-3.1 \pm 2.1$                   | $-7.8 \pm 1.6$                   |
|                             | QT3            | $0.2 \pm 3.5$ | $25.7 \pm 13.5$             | $-30.7 \pm 580$                  | $-24.4 \pm 580$                  | $-6.3 \pm 0.7$                   |
| QT2,4 two-<br>sets of sites | QT2            | $1.2 \pm 0.1$ | $0.5 \pm 0.2$               | $-12.5 \pm 0.2$                  | $-3.8 \pm 0.5$                   | $-8.6 \pm 0.4$                   |
|                             | QT4            | $0.6 \pm 0.6$ | $10.6 \pm 3.1$              | $-5.7 \pm 7.3$                   | $1.1 \pm 7.3$                    | $-6.8 \pm 0.2$                   |

(Top) Simple origin fits to the “Single set of sites” model which assumes that each binding site present in the protein is equivalent. (Middle) Origin fits to the “Sequential binding site” model which assumes that binding events must occur in a particular order. (Bottom) Origin fits to the “two-sets of sites” model which assumes there are two distinct types of binding sites in a protein.

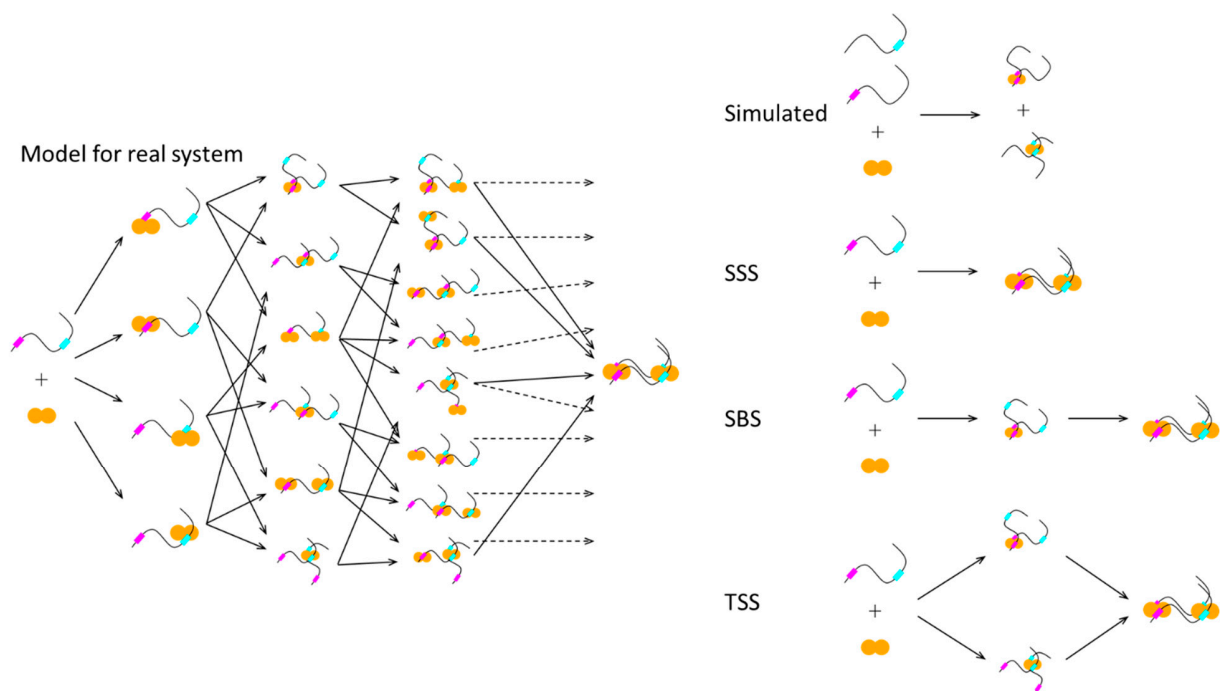

Figure S1) Algorithm Models. Model of what is happening in the ITC titrations of the double-site variants compared to the models used by the various algorithms discussed in this paper to try to assess these systems.

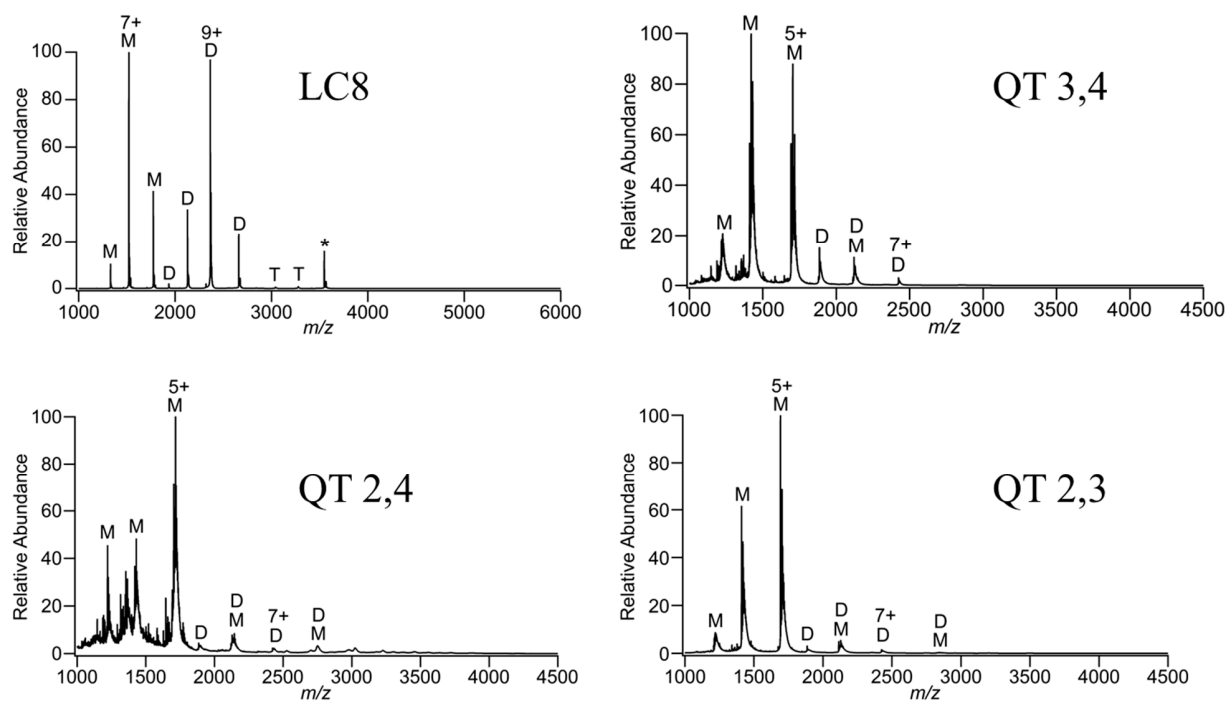

Figure S2) Mass spectra of each of the individual species analyzed. \*  $p \leq 0.05$ .

**Table S2. Observed versus expected masses for individual proteins and complexes**

| Protein                      | Charge states | Sequence mass (Da)  | Measured mass (average $\pm$ s.d., Da) |
|------------------------------|---------------|---------------------|----------------------------------------|
| LC8                          | 6-10+         | 10639.11            | 10638.75 $\pm$ 0.04                    |
| QT2,3                        | 3-7+          | 8475.26             | 8452.77 $\pm$ 0.07                     |
| QT2,4                        | 4-7+          | 8472.20             | 8510 $\pm$ 1                           |
| QT3,4                        | 3-7+          | 8475.26             | 8452.47 $\pm$ 0.27                     |
| Species/complex              | Charge states | Expected mass (Da)  | Measured mass (average $\pm$ s.d., Da) |
| LC8 monomer                  | 6-9+          | 10638.75 $\pm$ 0.04 | 10638.82 $\pm$ 0.04                    |
| LC8 dimer                    | 8-11+         | 21277.51 $\pm$ 0.07 | 21278.3 $\pm$ 0.5                      |
| LC8 tetramer                 | 11-14+        | 42555.01 $\pm$ 0.15 | 42558 $\pm$ 2                          |
| QT3,4 monomer                | 5-7+          | 8452.5 $\pm$ 0.3    | 8452.4 $\pm$ 0.5                       |
| QT3,4 monomer + LC8 dimer    | 9-13+         | 29729.98 $\pm$ 0.28 | 29732.52 $\pm$ 0.21                    |
| QT3,4 monomer + 2 LC8 dimers | 13-16+        | 51007.49 $\pm$ 0.31 | 51013 $\pm$ 7                          |
| QT3,4 dimer + 2 LC8 dimers   | 13-20+        | 59460.0 $\pm$ 0.6   | 59464 $\pm$ 16                         |
| QT3,4 dimer + 3 LC8 dimers   | 16-20+        | 80737.5 $\pm$ 0.6   | 80766 $\pm$ 20                         |
| QT2,4 monomer                | 5-7+          | 8510 $\pm$ 1        | 8508 $\pm$ 6                           |
| QT2,4 monomer + LC8 dimer    | 9-13+         | 29788 $\pm$ 1       | 29788.1 $\pm$ 0.2                      |
| QT2,4 monomer + 2 LC8 dimers | 15-18+        | 51065 $\pm$ 1       | 51073 $\pm$ 4                          |
| QT2,4 dimer + 2 LC8 dimers   | 14-21+        | 59576 $\pm$ 2       | 59576 $\pm$ 21                         |
| QT2,4 dimer + 3 LC8 dimers   | 16-20+        | 80853 $\pm$ 2       | 80854 $\pm$ 11                         |
| QT2,3 monomer                | 5-7+          | 8452.77 $\pm$ 0.07  | 8452.63 $\pm$ 0.3                      |
| QT2,3 monomer + LC8 dimer    | 10-12+        | 29730.28 $\pm$ 0.10 | 29732.01 $\pm$ 0.33                    |
| QT2,3 monomer + 2 LC8 dimers | 12-16+        | 51007.78 $\pm$ 0.16 | 51036 $\pm$ 22                         |
| QT2,3 dimer + 2 LC8 dimers   | 13-20+        | 59460.56 $\pm$ 0.20 | 59510 $\pm$ 31                         |
| QT2,3 dimer + 3 LC8 dimers   | 15-20+        | 80738.06 $\pm$ 0.26 | 80804 $\pm$ 54                         |
